# Supplementary material for: eIF4B and eIF4H mediate GR production from expanded G4C2 in a Drosophila model for C9orf72-associated ALS
Source: Springer Nature journal article supplement (doi:10.1186/s40478-019-0711-9), 2019-04-25
Supplement: MOESM2 [file 25666742]

**Table S2: Translation factor screen details**

| Sources                                          |
|--------------------------------------------------|
| BDSC: Bloomington <i>Drosophila</i> Stock Center |
| VDRC: Vienna <i>Drosophila</i> Resource Center   |

| Color scheme |                 |           |               |          |                 |            |
|--------------|-----------------|-----------|---------------|----------|-----------------|------------|
| Suppressor   | Mild Suppressor | No Effect | Mild Enhancer | Enhancer | Lethal Enhancer | not tested |

| Fly Gene          |         |             | Human      | Loss-of-function (LOF) line tested |         |        |           |                                          | Final Call                       | LDS-(G4C2) <sub>EXP</sub> |                 | (GR) <sub>36</sub> | Alone     | Control (LacZ)    |                                                                 |
|-------------------|---------|-------------|------------|------------------------------------|---------|--------|-----------|------------------------------------------|----------------------------------|---------------------------|-----------------|--------------------|-----------|-------------------|-----------------------------------------------------------------|
| Gene Symbol       | CG #    | Flybase #   | orthologue | Source                             | Stock # | Type   | Details   | RNAi                                     |                                  | Toxicity                  | GR-GFP levels   | Toxicity           | Phenotype | expression        | Notes                                                           |
| eIF4B             | CG10837 | FBgn0020660 | EIF4B      | BDSC                               | 57305   | RNAi   | Valium 20 | y1 sc* v1; P{TRiP.HMS04503}attP40        | Candidate RAN-translation factor | Suppressor                | Suppressor      | Enhancer           | No Effect | No Effect         | Similar results seen with VDRC stock #330010 (RNAi.VSH330010)   |
| eIF4H1            | CG4429  | FBgn0262734 | EIF4H      | BDSC                               | 57306   | RNAi   | Valium 20 | y1 sc* v1; P{TRiP.HMS04504}attP40        | Candidate RAN-translation factor | Suppressor                | Suppressor      | Enhancer           | No Effect | No Effect         | Similar results seen with VDRC stock #100817 (RNAi.KK108805)    |
| eIF4E3            | CG8023  | FBgn0265089 | EIF4E      | BDSC                               | 53880   | RNAi   | Valium 20 | y1 v1; P{TRiP.HMJ21195}attP40            | Candidate RAN-translation factor | Suppressor                | Suppressor      | Enhancer           | No Effect | No Effect         |                                                                 |
| eIF4E4            | CG10124 | FBgn0035709 | EIF4E      | BDSC                               | 50951   | RNAi   | Valium 20 | y1 v1; P{TRiP.HMJ21052}attP40            | Candidate RAN-translation factor | Suppressor                | Suppressor      | Enhancer           | No Effect | No Effect         |                                                                 |
| eIF4E7            | CG32859 | FBgn0040368 | EIF4E      | BDSC                               | 33471   | mutant | EP-REV    | P{EP}eIF4E7G1355 w*                      | Candidate RAN-translation factor | Suppressor                | Suppressor      | No Effect          |           | No Effect         |                                                                 |
| eIF5B             | CG10840 | FBgn0026259 | EIF5B      | BDSC                               | 44418   | RNAi   | Valium 22 | y1 sc* v1; P{TRiP.GL01593}attP2/TM3, Sb1 | Candidate RAN-translation factor | Suppressor                | Suppressor      | No Effect          |           | Mild upregulation |                                                                 |
| eIF5              | CG9177  | FBgn0030719 | EIF5       | BDSC                               | 34841   | RNAi   | Valium 20 | y1 sc* v1; P{TRiP.HMS00159}attP2         | Candidate RAN-translation factor | Suppressor                | Suppressor      | No Effect          | No Effect | No Effect         |                                                                 |
| eIF2β             | CG4153  | FBgn0004926 | EIF2S2     | BDSC                               | 53268   | RNAi   | Valium 20 | y1 sc* v1; P{TRiP.HMC02396}attP2/TM3,    | Candidate RAN-translation factor | Mild Suppressor           | Suppressor      | No Effect          | No Effect | No Effect         |                                                                 |
| eIF3d1 (eIF-3p66) | CG10161 | FBgn0040227 | EIF3D      | BDSC                               | 20072   | mutant | EP-REV    | y1 w67c23; P{EPgy2}eIF3d1EY05735/TM3,    | Candidate RAN-translation factor | Mild Suppressor           | Mild Suppressor | No Effect          |           | No Effect         |                                                                 |
| eIF4E5            | CG8277  | FBgn0035823 | EIF4E      | BDSC                               | 66332   | RNAi   | Valium 20 | y1 sc* v1; P{TRiP.HMC06261}attP40        | Candidate RAN-translation factor | No Effect                 | Suppressor      | Enhancer           | No Effect | No Effect         |                                                                 |
| eIF3i (eIF3-S2)   | CG8882  | FBgn0015834 | EIF3I      | BDSC                               | 34978   | RNAi   | Valium 20 | y1 sc* v1; P{TRiP.HMS01387}attP2         | Candidate RAN-translation factor | No Effect                 | Mild Suppressor | No Effect          |           | No Effect         |                                                                 |
| eIF3K             | CG10306 | FBgn0034654 | EIF3K      | BDSC                               | 44493   | RNAi   | Valium 20 | y1 sc* v1; P{TRiP.HMC02415}attP2         | Potential RAN-translation factor | No Effect                 | Mild Enhancer   | No Effect          | No Effect | No Effect         |                                                                 |
| eIF2By            | CG8190  | FBgn0034029 | EIF2B3     | BDSC                               | 41948   | RNAi   | Valium 20 | y1 sc* v1; P{TRiP.HMS02345}attP40        | G4C2 Suppressor                  | Suppressor                | No Effect       | Enhancer           |           |                   |                                                                 |
| eEF2              | CG2238  | FBgn0000559 | EEF2       | BDSC                               | 21351   | mutant | EP-REV    | y1 w67c23; P{EPgy2}eEF2EY02807/CyO       | G4C2 Suppressor                  | Suppressor                | No Effect       | No Effect          |           |                   |                                                                 |
| eIF2Bδ            | CG10315 | FBgn0034858 | EIF2B4     | BDSC                               | 15441   | mutant | EP-REV    | y1 w67c23; P{EPgy2}eIF2BδEY03558         | G4C2 Suppressor                  | Suppressor                | No Effect       | No Effect          |           |                   |                                                                 |
| eEF1β             | CG6341  | FBgn0028737 | EEF1B2     | BDSC                               | 16371   | mutant | EP-REV    | y1 w67c23; P{EPgy2}eEF1βEY05513          | G4C2 Suppressor                  | Suppressor                | No Effect       | No Effect          |           |                   |                                                                 |
| eIF4G1            | CG10811 | FBgn0023213 | EIF4G3     | BDSC                               | 33049   | RNAi   | Valium 20 | y1 sc* v1; P{TRiP.HMS00762}attP2         | GR suppressor                    | Suppressor                | Mild Enhancer   | Mild Suppressor    | No Effect | No Effect         |                                                                 |
| eIF3b (eIF3-S9)   | CG4878  | FBgn0034237 | EIF3B      | BDSC                               | 32880   | RNAi   | Valium 20 | y1 sc* v1; P{TRiP.HMS00668}attP2         | GR Enhancer                      | Enhancer                  | Enhancer        | Enhancer           | No Effect | No Effect         |                                                                 |
| eIF3l             | CG5642  | FBgn0036258 | EIF3L      | BDSC                               | 50959   | RNAi   | Valium 20 | y1 v1; P{TRiP.HMJ21061}attP40/CyO        | GR Enhancer                      | Mild Enhancer             | Mild Enhancer   | Enhancer           | No Effect |                   |                                                                 |
| eIF4E1            | CG4035  | FBgn0015218 | EIF4E      | BDSC                               | 34096   | RNAi   | Valium 20 | y1 sc* v1; P{TRiP.HMS00969}attP2         | GR Enhancer                      | No Effect                 | Mild Enhancer   | Enhancer           | No Effect |                   |                                                                 |
| NAT1              | CG3845  | FBgn0010488 | EIF4G2     | BDSC                               | 32357   | RNAi   | Valium 20 | y1 sc* v1; P{TRiP.HMS00348}attP2         | GR Enhancer                      | No Effect                 | Enhancer        | Mild Enhancer      | No Effect | No Effect         |                                                                 |
| eIF5C             | CG2922  | FBgn0250753 | BZW1       | BDSC                               | 27248   | RNAi   | Valium 10 | y1 v1; P{TRiP.JF02556}attP2              | GR Enhancer                      | Enhancer                  | Enhancer        | Enhancer           | No Effect |                   | similar results seen with BDSC stock #38918 (RNAi.TRiP.GL00690) |
| eIF1              | CG17737 | FBgn0035423 | EIF1B      | BDSC                               | 57174   | RNAi   | Valium 20 | y1 sc* v1; P{TRiP.HMC04556}attP40        | No Effect                        | No Effect                 | No Effect       | Enhancer           |           |                   |                                                                 |



|              |         |             |                   |  |  |  |  |  |            |  |  |  |  |  |  |
|--------------|---------|-------------|-------------------|--|--|--|--|--|------------|--|--|--|--|--|--|
| eIF4E6       | CG1442  | FBgn0039622 | EIF4E,<br>EIF4E1B |  |  |  |  |  | not tested |  |  |  |  |  |  |
| eIF5A (eEF5) | CG3186  | FBgn0285952 | EIF5A2            |  |  |  |  |  | not tested |  |  |  |  |  |  |
| eIF6         | CG17611 | FBgn0034915 | EIF6              |  |  |  |  |  | not tested |  |  |  |  |  |  |
