# Supplementary material for: eIF4B and eIF4H mediate GR production from expanded G4C2 in a Drosophila model for C9orf72-associated ALS
Source: Springer Nature journal article supplement (doi:10.1186/s40478-019-0711-9), 2019-04-25
Supplement: MOESM3 [file 25666742]

**Table S3: cell lines**

| <b>Fibroblast cell line #</b> | <b>NINDS/Coriell Code</b> | <b>Mutation</b>              | <b>Diagnosis</b> | <b>Age at onset</b> | <b>Age at sampling</b> | <b>Gender</b> | <b>Source</b> |
|-------------------------------|---------------------------|------------------------------|------------------|---------------------|------------------------|---------------|---------------|
| 1                             | ND29178                   | n/a                          | healthy          | n/a                 | 66                     | M             | Rutgers       |
| 2                             | ND29510                   | n/a                          | healthy          | n/a                 | 55                     | F             | Rutgers       |
| 3                             | ND34769                   | n/a                          | healthy          | n/a                 | 68                     | F             | Rutgers       |
| 4                             | ND36320                   | n/a                          | healthy          | n/a                 | 71                     | F             | Rutgers       |
| 5                             | ND38530                   | n/a                          | healthy          | n/a                 | 55                     | M             | Rutgers       |
| 6                             | ND40069                   | <i>C9orf72: Intermediate</i> | Parkinsonism     | 71                  | 75                     | F             | Rutgers       |
| 7                             | ND42496                   | <i>C9orf72</i>               | FTD              | At Risk             | 57                     | M             | Rutgers       |
| 8                             | ND42504                   | <i>C9orf72</i>               | FTD              | At Risk             | 53                     | F             | Rutgers       |
| 9                             | ND42506                   | <i>C9orf72</i>               | FTD              | At Risk             | 46                     | F             | Rutgers       |
