# Supplementary material for: eIF4B and eIF4H mediate GR production from expanded G4C2 in a Drosophila model for C9orf72-associated ALS
Source: Springer Nature journal article supplement (doi:10.1186/s40478-019-0711-9), 2019-04-25
Supplement: MOESM4 [file 25666742]

**Table S4: Patient samples**

The sample median (minimum, 25th percentile, 75th percentile, and maximum) is given for age at onset, age at death and disease duration, all given in years.

|                         | <b>C9orf72-positive</b>   |                          |                           |                           |
|-------------------------|---------------------------|--------------------------|---------------------------|---------------------------|
|                         | <b>All</b>                | <b>ALS</b>               | <b>ALS/FTLD</b>           | <b>FTLD</b>               |
| <b>Number of cases</b>  | 66                        | 19                       | 21                        | 26                        |
| <b>Gender (male)</b>    | 38 (57.58%)               | 7 (36.84%)               | 12 (57.14%)               | 19 (73.08%)               |
| <b>Age at onset</b>     | 61 (41, 55, 67, 79)       | 56 (41, 49, 61, 69)      | 58 (50, 54, 65, 74)       | 66 (44, 57, 70, 79)       |
| <b>Age at death</b>     | 64 (43, 59, 72, 90)       | 60 (43, 51, 64, 72)      | 62 (51, 60, 68, 80)       | 72 (52, 65, 78, 90)       |
| <b>Disease duration</b> | 3.9 (1.0, 2.3, 6.7, 14.5) | 2.1 (1.0, 1.5, 3.1, 6.3) | 4.8 (1.1, 2.7, 6.7, 10.4) | 7.3 (2.4, 5.8, 9.4, 14.5) |

|                         | <b>C9orf72-negative</b>   |                           |                           |                            |
|-------------------------|---------------------------|---------------------------|---------------------------|----------------------------|
|                         | <b>All</b>                | <b>ALS</b>                | <b>ALS/FTLD</b>           | <b>FTLD</b>                |
| <b>Number of cases</b>  | 46                        | 21                        | 9                         | 16                         |
| <b>Gender (male)</b>    | 21 (45.65%)               | 10 (47.62%)               | 3 (33.33%)                | 8 (50.00%)                 |
| <b>Age at onset</b>     | 66 (45, 57, 73, 86)       | 59 (45, 49, 66, 76)       | 70 (46, 57, 70, 78)       | 73 (57, 66, 80, 86)        |
| <b>Age at death</b>     | 72 (47, 64, 83, 100)      | 66 (47, 59, 71, 83)       | 73 (49, 63, 78, 85)       | 85 (66, 78, 89, 100)       |
| <b>Disease duration</b> | 4.6 (0.6, 2.9, 8.6, 21.9) | 3.4 (0.9, 2.0, 4.8, 21.5) | 2.9 (0.6, 1.8, 7.8, 21.9) | 8.5 (3.9, 8.2, 10.1, 20.5) |

|                        | <b>Healthy controls</b> |
|------------------------|-------------------------|
| <b>Number of cases</b> | 22                      |
| <b>Gender (male)</b>   | 12 (54.54%)             |
| <b>Age at death</b>    | 79 (57, 64, 89, 99)     |
