# Supplementary material for: eIF4B and eIF4H mediate GR production from expanded G4C2 in a Drosophila model for C9orf72-associated ALS
Source: Springer Nature journal article supplement (doi:10.1186/s40478-019-0711-9), 2019-04-25
Supplement: MOESM5 [file 25666742]

**Table S5: Fly lines used**

| Name                                                                       | Location | Source          | ID #   | Full genotype                                        |
|----------------------------------------------------------------------------|----------|-----------------|--------|------------------------------------------------------|
| Gmr-GAL4 (III)                                                             | 3        | Matthew Freeman | n/a    | w*;; Gmr-GAL4 <sup>YH3</sup> /TM3,Sb                 |
| Gmr-GAL4 (II)                                                              | 2        | BDSC            | 1104   | w*; Gmr-GAL4;                                        |
| Da-GAL4                                                                    | 3        | BDSC            | 55851  | w*;; Da-GAL4                                         |
| HS-GAL4                                                                    | 3        | BDSC            | 1799   | w[*];; P{w[+mC]=GAL4-Hsp70.PB}89-2-1                 |
| Control (DSRED)                                                            | 2        | Nancy Bonini    | n/a    | w[1118]; UAS-DSRED;                                  |
| LDS-(G4C2) <sub>CTRL</sub> ;<br>LDS-(G4C2) <sub>12</sub> <sup>GR-GFP</sup> | 3        | Nancy Bonini    | n/a    | w[1118];; UAS-LDS-(G4C2) <sub>4,9,12</sub> [GR-GFP]  |
| LDS-(G4C2) <sub>EXP</sub> ;<br>LDS-(G4C2) <sub>44</sub> <sup>GR-GFP</sup>  | 3        | Nancy Bonini    | n/a    | w[1118];; UAS-LDS-(G4C2) <sub>4,42,44</sub> [GR-GFP] |
| Control (w <sup>1118</sup> )                                               | n/a      | BDSC            | 5905   | w[1118];;                                            |
| Control RNAi                                                               | 3        | BDSC            | 31603  | y[1] v[1];; P{y[+t7.7] v[+t1.8]=TRiP.JF01355}attP2   |
| (GR)36                                                                     | 2        | BDSC            | 58692  | w[1118]; P{y[+t7.7] w[+mC]=UAS-poly-GR.PO-36}attP40; |
| eIF4B RNAi                                                                 | 2        | BDSC            | 57305  | y1 sc* v1; P{TRiP.HMS04503}attP40;                   |
| eIF4B RNAi-2                                                               | 2        | VDRC            | 330010 | w*; P{VSH330010}attP40;                              |
| eIF4H1 RNAi                                                                | 2        | BDSC            | 57306  | y1 sc* v1; P{TRiP.HMS04504}attP40;                   |
| eIF4H1 RNAi-2                                                              | 2        | VDRC            | 100817 | w*; P{KK108805}VIE-260B;                             |

BDSC = Bloomington *Drosophila* Stock Center

VDRC = Vienna *Drosophila* Resource Center
