# Supplementary material for: eIF4B and eIF4H mediate GR production from expanded G4C2 in a Drosophila model for C9orf72-associated ALS
Source: Springer Nature journal article supplement (doi:10.1186/s40478-019-0711-9), 2019-04-25
Supplement: MOESM6 [file 25666742]

**Table S6: primers**

| <b>Target</b> | <b>Species</b> | <b>Assay</b> | <b>Forward (5'-3')</b>      | <b>Reverse (5'-3')</b> | <b>Reference</b>                   |
|---------------|----------------|--------------|-----------------------------|------------------------|------------------------------------|
| LDS-G4C2      | <i>Dmel.</i>   | PCR          | ACTCGCTGAGGGTGAACAAG        | CGACTCCTGAGTTCCAGAGC   | Goodman et al, Nat Neuro, in press |
| GFP tag       | <i>Dmel.</i>   | qPCR         | ACGTAAACGGCCACAAGTTC        | AAGTCGTGCTGCTTCATGTG   | Goodman et al, Nat Neuro, in press |
| RP49          | <i>Dmel.</i>   | qPCR         | TGTCCTTCCAGCTTCAAGATGACCATC | CTTGGGCTTGCGCCATTTGTG  | Gabler, M. et al., 2005            |
| eIF4B         | <i>Dmel.</i>   | qPCR         | CGCATTGAGCTATCGAATGA        | CCAATTTCCGGAATCCCTAT   | this paper                         |
| eIF4H1        | <i>Dmel.</i>   | qPCR         | GGGAAACGGATCAGTTCAAA        | CTTCTGGAACCGTCTCTGC    | this paper                         |
| EIF4H         | <i>Hsap.</i>   | qPCR         | GGTGGCTTTGGATTCAGAAA        | CCCTGAAGCCAGAATTGAAG   | this paper                         |
| EIF4B         | <i>Hsap.</i>   | qPCR         | AGCTCAGACACAGAGCAGCA        | CTTTCCTTCCTGGTCCTTCC   | this paper                         |
| RPLP0         | <i>Hsap</i>    | qPCR         | TCTACAACCCTGAAGTGCTTGAT     | CAATCTGCAGACAGACACTGG  | Goodman et al, Nat Neuro, in press |
| GAPDH         | <i>Hsap</i>    | qPCR         | GTTCGACAGTCAGCCGCATC        | GGAATTTGCCATGGGTGGA    | Goodman et al, Nat Neuro, in press |
