# Supplementary material for: eIF4B and eIF4H mediate GR production from expanded G4C2 in a Drosophila model for C9orf72-associated ALS
Source: Springer Nature journal article supplement (doi:10.1186/s40478-019-0711-9), 2019-04-25
Supplement: MOESM7 [file 25666742]

**Table S1: Full genotypes in figures**

| Fig. 1C                                                     |  | Genotype (driver: HS-GAL4, BL2077)                                                                                                                                                                                                   | Includes    |       |
|-------------------------------------------------------------|--|--------------------------------------------------------------------------------------------------------------------------------------------------------------------------------------------------------------------------------------|-------------|-------|
| LDS-(G4C2) <sub>CTRL</sub> <sup>GR-GFP</sup>                |  | <i>w</i> <sup>1118</sup> , <i>UAS-LDS-(G4C2)</i> <sub>4,9,12</sub> <sup>GR-GFP</sup> / <i>w</i> *; <i>GAL4-Hsp70/+</i> ;                                                                                                             |             |       |
| LDS-(G4C2) <sub>EXP</sub> <sup>GR-GFP</sup>                 |  | <i>w</i> <sup>1118</sup> / <i>w</i> *; <i>GAL4-Hsp70/+</i> ; <i>UAS-LDS-(G4C2)</i> <sub>4,42,44</sub> <sup>GR-GFP</sup> /+                                                                                                           |             |       |
| Fig. 1D and Sup. Fig. 1                                     |  | Genotype (driver: GMR-GAL4 <sup>YH3</sup> )                                                                                                                                                                                          | Includes    | Temp  |
| LDS-(G4C2) <sub>CTRL</sub> <sup>GR-GFP</sup>                |  | <i>w</i> <sup>1118</sup> , <i>UAS-LDS-(G4C2)</i> <sub>4,9,12</sub> <sup>GR-GFP</sup> / <i>w</i> <sup>1118</sup> ;; <i>GMR-GAL4</i> <sup>YH3</sup> /+                                                                                 | UAS-DSRED   | 26 °C |
| LDS-(G4C2) <sub>EXP</sub> <sup>GR-GFP</sup>                 |  | <i>w</i> <sup>1118</sup> ;; <i>UAS-LDS-(G4C2)</i> <sub>4,42,44</sub> <sup>GR-GFP</sup> / <i>GMR-GAL4</i> <sup>YH3</sup>                                                                                                              |             | 26 °C |
| GFP CTRL                                                    |  | <i>w</i> <sup>1118</sup> ;; <i>UAS-GFP.NLS/GMR-GAL4</i> <sup>YH3</sup>                                                                                                                                                               | BDSC #4776  | 26 °C |
| Neg CTRL                                                    |  | <i>w</i> <sup>1118</sup> ;; <i>GMR-GAL4</i> <sup>YH3</sup> /+                                                                                                                                                                        |             | 26 °C |
| Fig. 1E                                                     |  | Genotype (driver: GMR-GAL4 <sup>YH3</sup> )                                                                                                                                                                                          | Includes    | Temp  |
| Positive Control                                            |  | <i>w</i> <sup>1118</sup> / <i>Y</i> ; <i>UAS-DSRED/+</i> ; <i>GMR-GAL4</i> <sup>YH3</sup> /+                                                                                                                                         | UAS-DSRED   | 26 °C |
| LDS-(G4C2) <sub>CTRL</sub> <sup>GR-GFP</sup>                |  | <i>w</i> <sup>1118</sup> , <i>UAS-LDS-(G4C2)</i> <sub>4,9,12</sub> <sup>GR-GFP</sup> / <i>Y</i> ; ;; <i>GMR-GAL4</i> <sup>YH3</sup> /+                                                                                               |             | 26 °C |
| LDS-(G4C2) <sub>EXP</sub> <sup>GR-GFP</sup>                 |  | <i>w</i> <sup>1118</sup> / <i>Y</i> ; ;; <i>UAS-LDS-(G4C2)</i> <sub>4,42,44</sub> <sup>GR-GFP</sup> / <i>GMR-GAL4</i> <sup>YH3</sup>                                                                                                 |             | 26 °C |
| Fig. 1F                                                     |  | Genotype (driver: GMR-GAL4 <sup>YH3</sup> )                                                                                                                                                                                          | Includes    | Temp  |
| DSRED                                                       |  | <i>w</i> <sup>1118</sup> / <i>Y</i> ; <i>UAS-DSRED/+</i> ; <i>GMR-GAL4</i> <sup>YH3</sup> /+                                                                                                                                         | UAS-DSRED   | 26 °C |
| LDS-(G4C2) <sub>CTRL</sub> <sup>GR-GFP</sup>                |  | <i>w</i> <sup>1118</sup> , <i>UAS-LDS-(G4C2)</i> <sub>4,9,12</sub> <sup>GR-GFP</sup> / <i>Y</i> ; ;; <i>GMR-GAL4</i> <sup>YH3</sup> /+                                                                                               |             | 26 °C |
| LDS-(G4C2) <sub>EXP</sub> <sup>GR-GFP</sup>                 |  | <i>w</i> <sup>1118</sup> / <i>Y</i> ; ;; <i>UAS-LDS-(G4C2)</i> <sub>4,42,44</sub> <sup>GR-GFP</sup> / <i>GMR-GAL4</i> <sup>YH3</sup>                                                                                                 |             | 26 °C |
| Fig. 2A - external eye toxicity                             |  | Genotype (driver: GMR-GAL4 <sup>YH3</sup> )                                                                                                                                                                                          | Includes    | Temp  |
| LDS-(G4C2) <sub>EXP</sub> <sup>GR-GFP</sup> w/ eIF4B RNAi   |  | <i>w</i> <sup>1118</sup> / <i>Y</i> ; <i>UAS-eIF4B RNAi</i> <sup>HMS04503</sup> /+; <i>UAS-LDS-(G4C2)</i> <sub>4,42,44</sub> <sup>GR-GFP</sup> , <i>GMR-GAL4</i> <sup>YH3</sup> /+                                                   | BDSC #57305 | 26 °C |
| LDS-(G4C2) <sub>EXP</sub> <sup>GR-GFP</sup> w/ Control RNAi |  | <i>w</i> <sup>1118</sup> / <i>Y</i> ; ;; <i>UAS-LDS-(G4C2)</i> <sub>4,42,44</sub> <sup>GR-GFP</sup> , <i>GMR-GAL4</i> <sup>YH3</sup> / <i>UAS-Luc RNAi</i> <sup>JF01355</sup>                                                        | BDSC #31603 | 26 °C |
| LDS-(G4C2) <sub>EXP</sub> <sup>GR-GFP</sup> w/ eIF3B RNAi   |  | <i>w</i> <sup>1118</sup> / <i>Y</i> ; ;; <i>UAS-LDS-(G4C2)</i> <sub>4,42,44</sub> <sup>GR-GFP</sup> , <i>GMR-GAL4</i> <sup>YH3</sup> / <i>UAS-eIF3B RNAi</i> <sup>HMS00668</sup>                                                     | BDSC #32880 | 26 °C |
| (GR) <sub>36</sub> w/ eIF4G1 RNAi                           |  | <i>w</i> <sup>1118</sup> / <i>y</i> <sup>1</sup> , <i>sc</i> *, <i>v</i> <sup>1</sup> ; <i>UAS-(GR)</i> <sub>36</sub> /+; <i>GMR-GAL4</i> <sup>YH3</sup> / <i>UAS-eIF4G1 RNAi</i> <sup>HMS00762</sup>                                | BDSC #33049 | 24 °C |
| (GR) <sub>36</sub> w/ Control RNAi                          |  | <i>w</i> <sup>1118</sup> / <i>y</i> <sup>1</sup> , <i>v</i> <sup>1</sup> ; <i>UAS-(GR)</i> <sub>36</sub> /+; <i>GMR-GAL4</i> <sup>YH3</sup> / <i>UAS-Luc RNAi</i> <sup>JF01355</sup>                                                 | BDSC #31603 | 24 °C |
| (GR) <sub>36</sub> w/ eIF4B RNAi                            |  | <i>w</i> <sup>1118</sup> / <i>y</i> <sup>1</sup> , <i>sc</i> *, <i>v</i> <sup>1</sup> ; <i>UAS-(GR)</i> <sub>36</sub> / <i>UAS-eIF4B RNAi</i> <sup>HMS04503</sup> ; <i>GMR-GAL4</i> <sup>YH3</sup> /+                                | BDSC #57305 | 24 °C |
| Fig. 2A - external eye GR-GFP                               |  | Genotype (driver: GMR-GAL4 <sup>YH3</sup> )                                                                                                                                                                                          | Includes    | Temp  |
| LDS-(G4C2) <sub>EXP</sub> <sup>GR-GFP</sup> w/ eIF4B RNAi   |  | <i>w</i> <sup>1118</sup> / <i>y</i> <sup>1</sup> , <i>sc</i> *, <i>v</i> <sup>1</sup> ; <i>UAS-eIF4B RNAi</i> <sup>HMS04503</sup> /+; <i>UAS-LDS-(G4C2)</i> <sub>4,42,44</sub> <sup>GR-GFP</sup> , <i>GMR-GAL4</i> <sup>YH3</sup> /+ | BDSC #57305 | 26 °C |
| LDS-(G4C2) <sub>EXP</sub> <sup>GR-GFP</sup> w/ Control RNAi |  | <i>w</i> <sup>1118</sup> / <i>y</i> <sup>1</sup> , <i>v</i> <sup>1</sup> ;; <i>UAS-LDS-(G4C2)</i> <sub>4,42,44</sub> <sup>GR-GFP</sup> , <i>GMR-GAL4</i> <sup>YH3</sup> / <i>UAS-Luc RNAi</i> <sup>JF01355</sup>                     | BDSC #31603 | 26 °C |
| LDS-(G4C2) <sub>EXP</sub> <sup>GR-GFP</sup> w/ eIF3B RNAi   |  | <i>w</i> <sup>1118</sup> / <i>y</i> <sup>1</sup> , <i>sc</i> *, <i>v</i> <sup>1</sup> ;; <i>UAS-LDS-(G4C2)</i> <sub>4,42,44</sub> <sup>GR-GFP</sup> , <i>GMR-GAL4</i> <sup>YH3</sup> / <i>UAS-eIF3B RNAi</i> <sup>HMS00668</sup>     | BDSC #32880 | 26 °C |
| Fig. 3A                                                     |  | Genotype (driver: Da-GAL4, III)                                                                                                                                                                                                      | Includes    | Temp  |

|                                                             |                                                                                                 |             |      |
|-------------------------------------------------------------|-------------------------------------------------------------------------------------------------|-------------|------|
| Control RNAi                                                | $w^{1118}/Y;; UAS-Luc RNAi^{JF01355}/Da-GAL4$                                                   | BDSC #31603 | 26°C |
| eIF4B RNAi                                                  | $w^{1118}/Y; UAS-eIF4B RNAi^{HMS04503}/+; Da-GAL4/+$                                            | BDSC #57305 | 26°C |
| eIF4H1 RNAi                                                 | $w^{1118}/Y; UAS-eIF4H1 RNAi^{HMS04504}/+; Da-GAL4/+$                                           | BDSC #57306 | 26°C |
| Fig. 3B                                                     | Genotype (driver: Da-GAL4, III)                                                                 | Includes    | Temp |
| progeny with eIF4B RNAi                                     | $UAS-eIF4B RNAi^{HMS04503}/+; Da-GAL4/+$                                                        | BDSC #57305 | 26°C |
| progeny without eIF4B RNAi                                  | $CyO/+; Da-GAL4/+$                                                                              |             | 26°C |
| progeny with eIF4H1 RNAi                                    | $UAS-eIF4B RNAi^{HMS04504}/+; Da-GAL4/+$                                                        | BDSC #57306 | 26°C |
| progeny without eIF4H1 RNAi                                 | $CyO/+; Da-GAL4/+$                                                                              |             | 26°C |
| Fig. 4A-B and 5A-B                                          | Genotype (driver: GMR-GAL4 <sup>YH3</sup> )                                                     | Includes    | Temp |
| LDS-(G4C2) <sub>EXP</sub> <sup>GR-GFP</sup> w/ Control RNAi | $w^{1118}/Y;; UAS-LDS-(G4C2)_{4,42,44}^{GR-GFP}, GMR-GAL4^{YH3}/UAS-Luc RNAi^{JF01355}$         | BDSC #31603 | 26°C |
| LDS-(G4C2) <sub>EXP</sub> <sup>GR-GFP</sup> w/ eIF4B RNAi   | $w^{1118}/Y; UAS-eIF4B RNAi^{HMS04503}/+; UAS-LDS-(G4C2)_{4,42,44}^{GR-GFP}, GMR-GAL4^{YH3}/+$  | BDSC #57305 | 26°C |
| LDS-(G4C2) <sub>EXP</sub> <sup>GR-GFP</sup> w/ eIF4H1 RNAi  | $w^{1118}/Y; UAS-eIF4H1 RNAi^{HMS04504}/+; UAS-LDS-(G4C2)_{4,42,44}^{GR-GFP}, GMR-GAL4^{YH3}/+$ | BDSC #57306 | 26°C |
| Fig. 4C-D                                                   | Genotype (driver: GMR-GAL4 <sup>YH3</sup> )                                                     | Includes    | Temp |
| (GR) <sub>36</sub> w/ Control RNAi                          | $w^{1118}/y^1, v^1; UAS-(GR)_{36}/+; GMR-GAL4^{YH3}/UAS-Luc RNAi^{JF01355}$                     | BDSC #31603 | 24°C |
| (GR) <sub>36</sub> w/ eIF4B RNAi                            | $w^{1118}/y^1, sc^*, v^1; UAS-(GR)_{36}/UAS-eIF4B RNAi^{HMS04503}; GMR-GAL4^{YH3}/+$            | BDSC #57305 | 24°C |
| (GR) <sub>36</sub> w/ eIF4B RNAi                            | $w^{1118}/y^1, sc^*, v^1; UAS-(GR)_{36}/UAS-eIF4B RNAi^{HMS04504}; GMR-GAL4^{YH3}/+$            | BDSC #57306 | 24°C |
| Fig. 4E-F                                                   | Genotype (driver: GMR-GAL4 <sup>YH3</sup> )                                                     | Includes    | Temp |
| Control RNAi                                                | $w^{1118}/Y;; GMR-GAL4^{YH3}/UAS-Luc RNAi^{JF01355}$                                            | BDSC #31603 | 26°C |
| eIF4B RNAi                                                  | $w^{1118}/Y; UAS-eIF4B RNAi^{HMS04503}/+; GMR-GAL4^{YH3}/+$                                     | BDSC #57305 | 26°C |
| eIF4H1 RNAi                                                 | $w^{1118}/Y; UAS-eIF4H1 RNAi^{HMS04504}/+; GMR-GAL4^{YH3}/+$                                    | BDSC #57306 | 26°C |
| Fig. 5C-D                                                   | Genotype (driver: GMR-GAL4 <sup>1104</sup> )                                                    | Includes    | Temp |
| DsRed w/ Control RNAi                                       | $w^{1118}/Y; UAS-DsRed, GMR-GAL4/+; UAS-Luc RNAi^{JF01355}/+$                                   | BDSC #31603 | 26°C |
| DsRed w/ eIF4B RNAi                                         | $w^{1118}/Y, v^1; UAS-DsRed, GMR-GAL4/UAS-eIF4B RNAi^{HMS04503};$                               | BDSC #57305 | 26°C |
| DsRed w/ eIF4B RNAi                                         | $w^{1118}/Y; UAS-DsRed, GMR-GAL4/UAS-eIF4B RNAi^{HMS04504};$                                    | BDSC #57306 | 26°C |
| Fig. 5E                                                     | Genotype (driver: GMR-GAL4 <sup>1104</sup> )                                                    | Includes    | Temp |
| LacZ w/ Control RNAi                                        | $w^{1118}/Y; UAS-LacZ, GMR-GAL4/+; UAS-Luc RNAi^{JF01355}/+$                                    | BDSC #31603 | 26°C |
| LacZ w/ eIF4B RNAi                                          | $w^{1118}/Y, v^1; UAS-LacZ, GMR-GAL4/UAS-eIF4B RNAi^{HMS04503};$                                | BDSC #57305 | 26°C |
| LacZ w/ eIF4B RNAi                                          | $w^{1118}/Y; UAS-LacZ, GMR-GAL4/UAS-eIF4B RNAi^{HMS04504};$                                     | BDSC #57306 | 26°C |
| Sup. Fig. 2                                                 | Genotype (driver: GMR-GAL4 <sup>YH3</sup> )                                                     | Includes    | Temp |
| Control RNAi                                                | $w^{1118}/Y;; UAS-LDS-(G4C2)_{4,42,44}^{GR-GFP}, GMR-GAL4^{YH3}/UAS-Luc RNAi^{JF01355}$         | BDSC #31603 | 26°C |

|                          |                                                                                                                                                       |              |       |
|--------------------------|-------------------------------------------------------------------------------------------------------------------------------------------------------|--------------|-------|
| eIF5B RNAi               | <i>w</i> <sup>1118</sup> /Y;; UAS-LDS-(G4C2) <sub>4,42,44</sub> <sup>GR-GFP</sup> , GMR-GAL4 <sup>YH3</sup> /UAS-eIF5B RNAi <sup>GL01593</sup>        | BDSC #57305  | 26 °C |
| eIF5 RNAi                | <i>w</i> <sup>1118</sup> /Y;; UAS-LDS-(G4C2) <sub>4,42,44</sub> <sup>GR-GFP</sup> , GMR-GAL4 <sup>YH3</sup> /UAS-eIF5 RNAi <sup>HMS00159</sup>        | BDSC #34841  | 26 °C |
| eIF2β RNAi               | <i>w</i> <sup>1118</sup> /Y;; UAS-LDS-(G4C2) <sub>4,42,44</sub> <sup>GR-GFP</sup> , GMR-GAL4 <sup>YH3</sup> /UAS-eIF2β RNAi <sup>HMC02396</sup>       | BDSC #53268  | 26 °C |
| eIF2Bα RNAi              | <i>w</i> <sup>1118</sup> /Y; UAS-eIF2Bα RNAi <sup>HMC03768</sup> /+; UAS-LDS-(G4C2) <sub>4,42,44</sub> <sup>GR-GFP</sup> , GMR-GAL4 <sup>YH3</sup> /+ | BDSC #55624  | 26 °C |
| eIF3g1 RNAi              | <i>w</i> <sup>1118</sup> /Y;; UAS-LDS-(G4C2) <sub>4,42,44</sub> <sup>GR-GFP</sup> , GMR-GAL4 <sup>YH3</sup> /UAS-eIF3g1 RNAi <sup>GLC01430</sup>      | BDSC #43243  | 26 °C |
| eEFSec RNAi              | <i>w</i> <sup>1118</sup> /Y;; UAS-LDS-(G4C2) <sub>4,42,44</sub> <sup>GR-GFP</sup> , GMR-GAL4 <sup>YH3</sup> /UAS-eIF3g1 RNAi <sup>GL01178</sup>       | BDSC #42805  | 26 °C |
| Sup. Fig. 3A             | Genotype (driver: Da-GAL4, III)                                                                                                                       | Includes     | Temp  |
| <i>w</i> <sup>1118</sup> | <i>w</i> <sup>1118</sup> /Y;; Da-GAL4/+                                                                                                               |              | 26 °C |
| eIF4B RNAi-2             | <i>w</i> <sup>1118</sup> /Y; UAS-eIF4B RNAi <sup>330010</sup> /+; Da-GAL4/+                                                                           | VDRC #330010 | 26 °C |
| eIF4H1 RNAi-2            | <i>w</i> <sup>1118</sup> /Y; UAS-eIF4H1 RNAi <sup>108805</sup> /+; Da-GAL4/+                                                                          | VDRC #100817 | 26 °C |
| Sup Fig. 3B-E            | Genotype (driver: GMR-GAL4 <sup>YH3</sup> )                                                                                                           | Includes     | Temp  |
| Control RNAi             | <i>w</i> <sup>1118</sup> /Y;; UAS-LDS-(G4C2) <sub>4,42,44</sub> <sup>GR-GFP</sup> , GMR-GAL4 <sup>YH3</sup> /UAS-Luc RNAi <sup>JF01355</sup>          | BDSC #31603  | 26 °C |
| eIF4B RNAi-2             | <i>w</i> <sup>1118</sup> /Y; UAS-eIF4B RNAi <sup>330010</sup> /+; UAS-LDS-(G4C2) <sub>4,42,44</sub> <sup>GR-GFP</sup> , GMR-GAL4 <sup>YH3</sup> /+    | VDRC #330010 | 26 °C |
| eIF4H1 RNAi-2            | <i>w</i> <sup>1118</sup> /Y; UAS-eIF4H1 RNAi <sup>108805</sup> /+; UAS-LDS-(G4C2) <sub>4,42,44</sub> <sup>GR-GFP</sup> , GMR-GAL4 <sup>YH3</sup> /+   | VDRC #100817 | 26 °C |
| Sup. Fig. 3F             | Genotype (driver: GMR-GAL4 <sup>1104</sup> )                                                                                                          | Includes     | Temp  |
| LacZ w/ Control          | <i>w</i> <sup>1118</sup> /Y; UAS-LacZ, GMR-GAL4/UAS-DSRED;                                                                                            | UAS-DSRED    | 26 °C |
| LacZ w/ eIF4B RNAi-2     | <i>w</i> <sup>1118</sup> /Y, v <sup>1</sup> ; UAS-LacZ, GMR-GAL4/UAS-eIF4B RNAi <sup>330010</sup> ;                                                   | VDRC #330010 | 26 °C |
| LacZ w/ eIF4B RNAi-2     | <i>w</i> <sup>1118</sup> /Y; UAS-LacZ, GMR-GAL4/UAS-eIF4B RNAi <sup>1088057</sup> ;                                                                   | VDRC #100817 | 26 °C |
